# Supplementary material for: Recent Molecular Characterization of Porcine Rotaviruses Detected in China and Their Phylogenetic Relationships with Human Rotaviruses
Source: MDPI journal article supplement (doi:10.3390/v16030453), 2024-03-14
Supplement: s1 [file s1]

|                     |        |           |              |            |           |             |      |       |          |              |            |       |       |      |       |          |                 |            |          |       |      |       |          |
|---------------------|--------|-----------|--------------|------------|-----------|-------------|------|-------|----------|--------------|------------|-------|-------|------|-------|----------|-----------------|------------|----------|-------|------|-------|----------|
| CHN/GD/XC2/2022     | 2022.1 | Guangdong | /            | /          | /         | /           | /    | /     | /        | /            | /          | /     | /     | /    | /     | /        | HN03(I5)        | MH021179.1 | China    | Pig   | 2018 | 97.57 | OQ799752 |
| CHN/GS/XC224/2022   | 2022.2 | Ganus     | CH-1(G1)     | GU188284.1 | China     | Giant panda | 2013 | 94.12 | OQ743977 | /            | /          | /     | /     | /    | /     | /        | /               | /          | /        | /     | /    | /     | /        |
| CHN/GS/XC5/2022     | 2022.2 | Ganus     | CH-1(G1)     | GU188284.1 | China     | Giant panda | 2013 | 94.22 | OQ743980 | /            | /          | /     | /     | /    | /     | /        | /               | /          | /        | /     | /    | /     | /        |
| CHN/GZ/KZM02/2022   | 2022.2 | Guizhou   | LL51695(G9)  | KC242226.1 | China     | Human       | 2013 | 94.29 | OQ743930 | R1954(P6)    | KF726067.1 | China | Human | 2013 | 96.61 | OQ799674 | R1954(I1)       | KF726068.1 | China    | Human | 2013 | 95.90 | OQ799771 |
| CHN/SD/LYXH/2022    | 2022.2 | Shandong  | SZ18(G4)     | OM920725.1 | China     | Human       | 2018 | 96.83 | OQ743863 | R1954(P6)    | KF726067.1 | China | Human | 2013 | 96.57 | OQ799669 | R946(I1)        | KF726057.1 | China    | Human | 2006 | 96.57 | OQ799766 |
| CHN/GX/DM4/2022     | 2022.2 | Guangxi   | HK69(G5)     | JN699034.1 | USA       | Human       | 2013 | 93.27 | OQ743867 | SCYA-H2(P13) | MT198757.1 | China | Pig   | 2019 | 96.78 | OQ799675 | VNM(I5)         | LC095879.1 | Japan    | Human | 2007 | 98.24 | OQ799772 |
| CHN/GZ/KZZD40/2022  | 2022.2 | Guizhou   | R1270(G4)    | LC389890.1 | Sri Lanka | Human       | 2009 | 96.53 | OQ743928 | /            | /          | /     | /     | /    | /     | /        | VNM-NT0042(I1)  | LC095890.1 | Vietnam  | Human | 2018 | 96.15 | OQ799779 |
| CHN/HeN/LBZD02/2022 | 2022.2 | Henan     | Segment9     | AY003871.1 | China     | Human       | 2004 | 94.70 | OQ743864 | HLJ/15(P23)  | KU886316.1 | China | Pig   | 2016 | 97.56 | OQ799671 | R479(I5)        | DQ873675.1 | China    | Human | 2007 | 96.15 | OQ799768 |
| CHN/GX/TL1/2022     | 2022.2 | Guangxi   | CU-B1738(G4) | KT00765.1  | Thailand  | Human       | 2013 | 96.32 | OQ743860 | GHA-14(P7)   | MN102368.1 | UK    | Pig   | 2016 | 93.44 | OQ799667 | CMH-N016-10(I1) | MG781035.1 | Thailand | Human | 2010 | 96.73 | OQ799762 |
| CHN/GX/TL3/2022     | 2022.2 | Guangxi   | CU-B1738(G4) | KT00765.1  | Thailand  | Human       | 2013 | 96.84 | OQ743859 | GHA-14(P7)   | MN102368.1 | UK    | Pig   | 2016 | 93.48 | OQ799668 | CMH-N016-10(I1) | MG781035.1 | Thailand | Human | 2010 | 96.73 | OQ799763 |
| CHN/GS/YM2/2022     | 2022.2 | Gansu     | 243(G1)      | MK050137.1 | Iran      | Human       | 2016 | 88.48 | OQ743868 | GHA-14(P7)   | MN102368.1 | UK    | Pig   | 2016 | 94.01 | OQ799677 | RMC321(I5)      | AF531913.1 | India    | Human | 2004 | 95.48 | OQ799774 |
| CHN/HN/BP2/2022     | 2022.2 | Hainan    | LLP48(G9)    | KJ126835.1 | China     | Pig         | 2018 | 97.07 | OQ743861 | /            | /          | /     | /     | /    | /     | /        | R1954(I1)       | KF726068.1 | China    | Human | 2013 | 96.73 | OQ799765 |
| CHN/GZ/KZZD39/2022  | 2022.2 | Guizhou   | /            | /          | /         | /           | /    | /     | /        | SCYA-H2(P13) | MT198757.1 | China | Pig   | 2019 | 97.17 | OQ799681 | R479(I5)        | DQ873675.1 | China    | Human | 2007 | 95.81 | OQ799778 |
| CHN/SD/LYXL/2022    | 2022.2 | Shandong  | Arg720A(G12) | EU496257.1 | Argentina | Human       | 2009 | 97.66 | OQ743862 | GHA-14(P7)   | MN102368.1 | UK    | Pig   | 2016 | 93.26 | OQ799670 | WH-a(I5)        | JN034041.1 | China    | Pig   | 2010 | 95.64 | OQ799767 |
| CHN/HeN/TY102/2022  | 2022.2 | Henan     | LLP48(G9)    | KJ126835.1 | China     | Pig         | 2018 | 97.06 | OQ743866 | SCMY-A3(P23) | MK026438.1 | China | Pig   | 2017 | 94.77 | OQ799673 | R479(I5)        | DQ873675.1 | China    | Human | 2007 | 96.23 | OQ799770 |
| CHN/HeN/TYZD02/2022 | 2022.2 | Henan     | TM-a-P60(G9) | MH697651.1 | China     | Pig         | 2018 | 97.15 | OQ743865 | SCMY-A3(P23) | MK026438.1 | China | Pig   | 2017 | 94.77 | OQ799672 | R479(I5)        | DQ873675.1 | China    | Human | 2007 | 96.31 | OQ799769 |
| CHN/GX/TL4/2022     | 2022.2 | Guangxi   | /            | /          | /         | /           | /    | /     | /        | /            | /          | /     | /     | /    | /     | /        | R1954(I1)       | KF726068.1 | China    | Human | 2013 | 96.73 | OQ799764 |
| CHN/GX/WG2/2022     | 2022.2 | Guangxi   | LL51695(G9)  | KC242226.1 | China     | Human       | 2013 | 94.01 | OQ743931 | /            | /          | /     | /     | /    | /     | /        | /               | /          | /        | /     | /    | /     | /        |
| CHN/GX/WG6/2022     | 2022.2 | Guangxi   | LL51695(G9)  | KC242226.1 | China     | Human       | 2013 | 94.50 | OQ743929 | SCYB-C3(P23) | MT198752.1 | China | Pig   | 2019 | 94.96 | OQ799676 | SWU-IC(I5)      | MK410285.1 | China    | Pig   | 2018 | 98.91 | OQ799773 |
| CHN/GZ/BJ2/2022     | 2022.2 | Guizhou   | SWU-1C(G9)   | MK410283.1 | China     | Pig         | 2018 | 95.52 | OQ743870 | SCYB-C3(P23) | MT198752.1 | China | Pig   | 2019 | 97.69 | OQ799678 | SWU-IC(I5)      | MK410285.1 | China    | Pig   | 2018 | 97.49 | OQ799775 |
| CHN/CY/GYSX/2022    | 2022.2 | Sichuan   | LLP48(G9)    | KJ126835.1 | China     | Pig         | 2018 | 97.36 | OQ743871 | GHA-14(P7)   | MN102368.1 | UK    | Pig   | 2016 | 94.59 | OQ799679 | ZZ-12(I5)       | KF303566.1 | China    | Pig   | 2013 | 97.07 | OQ799776 |

|                       |        |          |                 |             |           |       |      |       |           |             |             |          |       |      |       |           |                 |             |          |       |      |       |           |
|-----------------------|--------|----------|-----------------|-------------|-----------|-------|------|-------|-----------|-------------|-------------|----------|-------|------|-------|-----------|-----------------|-------------|----------|-------|------|-------|-----------|
| CHN/Shaanxi/H Z1/2022 | 2022.2 | Shaanxi  | /               | /           | /         | /     | /    | /     | /         | /           | /           | /        | /     | /    | /     | /         | HN03(15)        | MH021 179.1 | China    | Pig   | 2018 | 97.65 | OQ79 9760 |
| CHN/Shaanxi/H Z2/2022 | 2022.2 | Shaanxi  | /               | /           | /         | /     | /    | /     | /         | /           | /           | /        | /     | /    | /     | /         | HN03(15)        | MH021 179.1 | China    | Pig   | 2018 | 95.06 | OQ79 9761 |
| CHN/HuB/XZ3/2022      | 2022.2 | Hubei    | DZ-2(G5)        | KT8207 75.1 | China     | Pig   | 2016 | 97.06 | OQ74 3872 | CMP178(P13) | DQ536 362.1 | Thailand | Pig   | 2008 | 96.64 | OQ79 9680 | HN03(15)        | MH021 179.1 | China    | Pig   | 2018 | 98.24 | OQ79 9777 |
| CHN/Shaanxi/Y J/2022  | 2022.2 | Shaanxi  | HLJ-9(G9)       | JX4989 49.1 | China     | Pig   | 2012 | 96.02 | OQ74 3869 | /           | /           | /        | /     | /    | /     | /         | /               | /           | /        | /     | /    | /     | /         |
| CHN/SD/LYX H2/2022    | 2022.3 | Shandong | SZ18(G4)        | OM920 725.1 | China     | Human | 2018 | 96.73 | OQ74 3873 | R1954(P6)   | KF7260 67.1 | China    | Human | 2013 | 96.71 | OQ79 9682 | R946(11)        | KF7260 57.1 | China    | Human | 2006 | 96.73 | OQ79 9780 |
| CHN/CY/DY/2022        | 2022.3 | Sichuan  | HeN4(G4)        | JX4989 57.1 | China     | Pig   | 2012 | 97.86 | OQ74 3886 | R1207(P6)   | LC3898 88.1 | Japan    | Human | 2018 | 97.15 | OQ79 9691 | R1954(11)       | KF7260 68.1 | China    | Human | 2013 | 98.49 | OQ79 9793 |
| CHN/SD/LYX H3/2022    | 2022.3 | Shandong | DZ-2(G5)        | KT8207 75.1 | China     | Pig   | 2016 | 97.56 | OQ74 3874 | R1954(P6)   | KF7260 67.1 | China    | Human | 2013 | 96.53 | OQ79 9683 | R946(11)        | KF7260 57.1 | China    | Human | 2006 | 96.65 | OQ79 9781 |
| CHN/GX/TL5/2022       | 2022.3 | Guangxi  | CMH-N016-10(G4) | MG781 036.1 | Thailand  | Human | 2010 | 96.57 | OQ74 3880 | GHA-14(P7)  | MN102 368.1 | UK       | Pig   | 2016 | 93.48 | OQ79 9688 | CMH-N016-10(11) | MG781 035.1 | Thailand | Human | 2010 | 96.90 | OQ79 9788 |
| CHN/GX/NN/2022        | 2022.3 | Guangxi  | Arg720A(G12)    | EU4962 57.1 | Argentina | Human | 2009 | 97.66 | OQ74 3881 | /           | /           | /        | /     | /    | /     | /         | /               | /           | /        | /     | /    | /     | /         |
| CHN/GX/XS3/2022       | 2022.3 | Guangxi  | 684VN(G9)       | AB091 778.1 | Tokyo     | Human | 2002 | 95.24 | OQ74 3895 | /           | /           | /        | /     | /    | /     | /         | SCLS-3(15)      | MK597 975.1 | China    | Pig   | 2018 | 97.15 | OQ79 9803 |
| CHN/SD/CG/2022        | 2022.3 | Shandong | TM-a-P60(G9)    | MH697 651.1 | China     | Pig   | 2018 | 97.04 | OQ74 3875 | /           | /           | /        | /     | /    | /     | /         | JN-1(15)        | KT8207 68.1 | China    | Pig   | 2016 | 98.58 | OQ79 9782 |
| CHN/CY/SZ/2022        | 2022.3 | Sichuan  | HN03(G9)        | KY649 279.1 | China     | Pig   | 2015 | 97.66 | OQ74 3883 | CMP178(P13) | DQ536 362.1 | Thailand | Pig   | 2008 | 95.63 | OQ79 9689 | TA-4-1(15)      | KT8207 72.1 | China    | Pig   | 2016 | 96.48 | OQ79 9790 |
| CHN/CY/XP/2022        | 2022.3 | Sichuan  | HN03(G9)        | KY649 279.1 | China     | Pig   | 2015 | 97.45 | OQ74 3882 | /           | /           | /        | /     | /    | /     | /         | TA-4-1(15)      | KT8207 72.1 | China    | Pig   | 2016 | 96.48 | OQ79 9789 |
| CHN/CY/JH/2022        | 2022.3 | Sichuan  | SCJY-11(G9)     | MH910 079.1 | China     | Pig   | 2017 | 98.06 | OQ74 3889 | SC11(P23)   | MH624 176.1 | China    | Pig   | 2017 | 97.15 | OQ79 9693 | VNM141 50(15)   | KX363 332.1 | UK       | Pig   | 2016 | 95.58 | OQ79 9796 |
| CHN/GS/LZ/2022        | 2022.3 | Gansu    | HN03(G9)        | KY649 279.1 | China     | Pig   | 2015 | 97.25 | OQ74 3892 | /           | /           | /        | /     | /    | /     | /         | HN03(15)        | MH021 179.1 | China    | Pig   | 2018 | 98.66 | OQ79 9798 |
| CHN/CY/LS/2022        | 2022.3 | Sichuan  | ESP(G9)         | MZ643 386.1 | Spain     | Pig   | 2020 | 96.13 | OQ74 3887 | SWU-IC(P13) | MK410 284.1 | China    | Pig   | 2018 | 97.00 | OQ79 9692 | HN03(15)        | MH021 179.1 | China    | Pig   | 2018 | 98.41 | OQ79 9794 |
| CHN/SD/LCXH 03/2022   | 2022.3 | Shandong | SH0902(G1)      | GU124 595.1 | China     | Pig   | 2009 | 95.37 | OQ74 3893 | /           | /           | /        | /     | /    | /     | /         | TA-3-1(15)      | KT8207 71.1 | China    | Pig   | 2016 | 97.32 | OQ79 9799 |
| CHN/GX/MP1/2022       | 2022.3 | Guangxi  | /               | /           | /         | /     | /    | /     | /         | /           | /           | /        | /     | /    | /     | /         | TA-3-1(15)      | KT8207 71.1 | China    | Pig   | 2016 | 96.82 | OQ79 9785 |
| CHN/GX/MP2/2022       | 2022.3 | Guangxi  | LLP48(G9)       | KJ1268 35.1 | China     | Pig   | 2018 | 97.55 | OQ74 3878 | HLJ/15(P23) | KU886 316.1 | China    | Pig   | 2016 | 96.26 | OQ79 9686 | TA-3-1(15)      | KT8207 71.1 | China    | Pig   | 2016 | 96.65 | OQ79 9786 |
| CHN/GX/MP3/2022       | 2022.3 | Guangxi  | LLP48(G9)       | KJ1268 35.1 | China     | Pig   | 2018 | 97.36 | OQ74 3876 | HLJ/15(P23) | KU886 316.1 | China    | Pig   | 2016 | 96.32 | OQ79 9684 | TA-3-1(15)      | KT8207 71.1 | China    | Pig   | 2016 | 96.65 | OQ79 9783 |
| CHN/GX/MP5/2022       | 2022.3 | Guangxi  | LLP48(G9)       | KJ1268 35.1 | China     | Pig   | 2018 | 97.16 | OQ74 3877 | HLJ/15(P23) | KU886 316.1 | China    | Pig   | 2016 | 96.20 | OQ79 9685 | TA-3-1(15)      | KT8207 71.1 | China    | Pig   | 2016 | 96.73 | OQ79 9784 |
| CHN/GX/MP6/2022       | 2022.3 | Guangxi  | SH0902(G1)      | GU124 595.1 | China     | Pig   | 2009 | 94.86 | OQ74 3879 | GHA-14(P7)  | MN102 368.1 | UK       | Pig   | 2016 | 93.70 | OQ79 9687 | SWU-IC(15)      | MK410 285.1 | China    | Pig   | 2018 | 96.98 | OQ79 9787 |
| CHN/CY/QQ/2022        | 2022.3 | Sichuan  | SH0902(G1)      | GU124 595.1 | China     | Pig   | 2009 | 94.86 | OQ74 3890 | GHA-14(P7)  | MN102 368.1 | UK       | Pig   | 2016 | 94.23 | OQ79 9694 | TA-4-1(15)      | KT8207 72.1 | China    | Pig   | 2016 | 97.32 | OQ79 9797 |
| CHN/CY/SW/2022        | 2022.3 | Sichuan  | HN03(G9)        | KY649 279.1 | China     | Pig   | 2015 | 97.66 | OQ74 3888 | /           | /           | /        | /     | /    | /     | /         | TA-4-1(15)      | KT8207 72.1 | China    | Pig   | 2016 | 96.57 | OQ79 9795 |

|                       |        |          |              |            |          |             |      |       |          |              |            |       |       |      |       |          |               |            |         |       |      |       |          |
|-----------------------|--------|----------|--------------|------------|----------|-------------|------|-------|----------|--------------|------------|-------|-------|------|-------|----------|---------------|------------|---------|-------|------|-------|----------|
| CHN/LN/TW/2022        | 2022.3 | Liaoning | TM-a-P60(G9) | MH697651.1 | China    | Pig         | 2018 | 97.15 | OQ743891 | /            | /          | /     | /     | /    | /     | /        | /             | /          | /       | /     | /    | /     | /        |
| CHN/GX/TL6/2022       | 2022.3 | Guangxi  | LLP48(G9)    | KJ126835.1 | China    | Pig         | 2018 | 97.07 | OQ743894 | /            | /          | /     | /     | /    | /     | /        | /             | /          | /       | /     | /    | /     | /        |
| CHN/CY/TZ/2022        | 2022.3 | Sichuan  | SCQL-5-2(G3) | MG066590.1 | China    | Pig         | 2017 | 97.15 | OQ743885 | SCYA-H2(P13) | MT198757.1 | China | Pig   | 2019 | 97.21 | OQ799690 | TA-4-1(15)    | KT820772.1 | China   | Pig   | 2016 | 96.23 | OQ799792 |
| CHN/CY/YX/2022        | 2022.3 | Sichuan  | HN03(G9)     | KY649279.1 | China    | Pig         | 2015 | 97.45 | OQ743884 | /            | /          | /     | /     | /    | /     | /        | HN03(15)      | MH021179.1 | China   | Pig   | 2018 | 97.82 | OQ799791 |
| CHN/HeN/LB2/2022      | 2022.4 | Henan    | SD-18(G9)    | ON676185.1 | China    | Pig         | 2021 | 97.86 | OQ743898 | /            | /          | /     | /     | /    | /     | /        | R479(15)      | DQ873675.1 | China   | Human | 2007 | 96.57 | OQ799800 |
| CHN/HeN/TY204/2022    | 2022.4 | Henan    | /            | /          | /        | /           | /    | /     | /        | /            | /          | /     | /     | /    | /     | /        | R479(15)      | DQ873675.1 | China   | Human | 2007 | 95.90 | OQ799804 |
| CHN/GS/XC6/2022       | 2022.4 | Gansu    | TM-a-P20(G9) | MH697629.1 | China    | Pig         | 2018 | 97.45 | OQ743897 | /            | /          | /     | /     | /    | /     | /        | R479(15)      | DQ873675.1 | China   | Human | 2007 | 96.40 | OQ799801 |
| CHN/ZJ/04/2022        | 2022.4 | Zhejiang | /            | /          | /        | /           | /    | /     | /        | Z84(P6)      | MG570048.1 | China | Pig   | 2007 | 95.87 | OQ799695 | R1207(11)     | LC389889.1 | Japan   | Human | 2018 | 98.49 | OQ799805 |
| CHN/GZ/SB/2022        | 2022.4 | Guizhou  | /            | /          | /        | /           | /    | /     | /        | /            | /          | /     | /     | /    | /     | /        | SCLS-3(15)    | MK597975.1 | China   | Pig   | 2018 | 97.65 | OQ799802 |
| CHN/SD/CYFMD2/2022    | 2022.5 | Shandong | CH-1(G1)     | GU188284.1 | China    | Giant panda | 2013 | 94.50 | OQ743903 | /            | /          | /     | /     | /    | /     | /        | JN-1(15)      | KT820768.1 | China   | Pig   | 2016 | 98.49 | OQ799814 |
| CHN/HuB/GI4/2022      | 2022.5 | Hubei    | Segment9(G9) | AY003871.1 | China    | Human       | 2004 | 94.76 | OQ743914 | HLJ/15(P23)  | KU886316.1 | China | Pig   | 2016 | 97.51 | OQ799708 | R479(15)      | DQ873675.1 | China   | Human | 2007 | 96.30 | OQ799825 |
| CHN/HN/MY/2022        | 2022.5 | Hainan   | Segment9(G9) | AY003871.1 | China    | Human       | 2004 | 94.55 | OQ743909 | SWU-IC(P13)  | MK410284.1 | China | Pig   | 2018 | 96.88 | OQ799700 | VNM-30378(15) | HG513050.1 | Vietnam | Human | 2014 | 97.08 | OQ799810 |
| CHN/CY/SX3/2022       | 2022.5 | Sichuan  | LL4260(G5)   | EF159576.1 | China    | Human       | 2008 | 94.62 | OQ743989 | /            | /          | /     | /     | /    | /     | /        | R1954(11)     | KF726068.1 | China   | Human | 2013 | 98.27 | OQ799879 |
| CHN/CY/SXZD/2022      | 2022.5 | Sichuan  | /            | /          | /        | /           | /    | /     | /        | R1207(P6)    | LC389888.1 | Japan | Human | 2018 | 98.12 | OQ799744 | R1954(11)     | KF726068.1 | China   | Human | 2013 | 98.27 | OQ799878 |
| CHN/HuB/GI3/2022      | 2022.5 | Hubei    | SWU-1C(G9)   | MK410283.1 | China    | Pig         | 2018 | 94.86 | OQ743915 | /            | /          | /     | /     | /    | /     | /        | R479(15)      | DQ873675.1 | China   | Human | 2007 | 96.47 | OQ799824 |
| CHN/CY/LH9/2022       | 2022.5 | Sichuan  | HLJxf(G9)    | JX498950.1 | China    | Pig         | 2012 | 95.11 | OQ743917 | /            | /          | /     | /     | /    | /     | /        | R479(15)      | DQ873675.1 | China   | Human | 2007 | 96.19 | OQ799827 |
| CHN/Shaanxi/P C1/2022 | 2022.5 | Shaanxi  | LL51695(G9)  | KC242226.1 | China    | Human       | 2013 | 94.70 | OQ743901 | NMTL(P23)    | JF781161.1 | China | Pig   | 2008 | 94.95 | OQ799701 | WF-1-1(15)    | KT820773.1 | China   | Pig   | 2016 | 96.31 | OQ799811 |
| CHN/Shaanxi/P C/2022  | 2022.5 | Shaanxi  | LL51695(G9)  | KC242226.1 | China    | Human       | 2013 | 93.88 | OQ743900 | /            | /          | /     | /     | /    | /     | /        | VNM14150(15)  | KX363332.1 | UK      | Pig   | 2016 | 94.82 | OQ799808 |
| CHN/GZ/DY/2022        | 2022.5 | Guizhou  | VP7(G26)     | AB605258.1 | Japan    | Pig         | 2011 | 95.82 | OQ743911 | TWN-106(P3)  | OL956956.1 | China | Pig   | 2017 | 92.39 | OQ799705 | VNM14150(15)  | KX363332.1 | UK      | Pig   | 2016 | 95.73 | OQ799821 |
| CHN/GZ/KZMZD05/2022   | 2022.5 | Guizhou  | DZ-2(G5)     | KT820775.1 | China    | Pig         | 2016 | 97.96 | OQ743926 | SCYA-H2(P13) | MT198757.1 | China | Pig   | 2019 | 96.66 | OQ799697 | TA-3-1(15)    | KT820771.1 | China   | Pig   | 2016 | 96.49 | OQ799807 |
| CHN/GZ/KZM2/2022      | 2022.5 | Guizhou  | LLP48(G9)    | KJ126835.1 | China    | Pig         | 2018 | 95.66 | OQ743927 | SCYA-H2(P13) | MT198757.1 | China | Pig   | 2019 | 95.59 | OQ799696 | TA-3-1(15)    | KT820771.1 | China   | Pig   | 2016 | 96.49 | OQ799806 |
| CHN/CY/LH5/2022       | 2022.5 | Sichuan  | HLJxf(G9)    | JX498950.1 | China    | Pig         | 2012 | 95.18 | OQ743910 | HLJ/15(P23)  | KU886316.1 | China | Pig   | 2016 | 97.01 | OQ799698 | JN-1(15)      | KT820768.1 | China   | Pig   | 2016 | 98.19 | OQ799820 |
| CHN/Shaanxi/P C4/2022 | 2022.5 | Shaanxi  | VP7(G5)      | DQ515961.1 | Thailand | Pig         | 2018 | 92.15 | OQ743902 | NMTL(P23)    | JF781161.1 | China | Pig   | 2008 | 94.91 | OQ799702 | TA-4-1(15)    | KT820772.1 | China   | Pig   | 2016 | 97.49 | OQ799813 |

|                       |        |          |              |            |         |             |      |       |          |              |            |            |     |      |       |          |              |            |       |     |      |       |          |
|-----------------------|--------|----------|--------------|------------|---------|-------------|------|-------|----------|--------------|------------|------------|-----|------|-------|----------|--------------|------------|-------|-----|------|-------|----------|
| CHN/HeN/TQ/2022       | 2022.5 | Henan    | HN03(G9)     | KY649279.1 | China   | Pig         | 2015 | 98.17 | OQ743918 | /            | /          | /          | /   | /    | /     | /        | /            | /          | /     | /   | /    | /     | /        |
| CHN/HeN/TYZD05/2022   | 2022.5 | Henan    | LLP48(G9)    | KJ126835.1 | China   | Pig         | 2018 | 97.17 | OQ743899 | /            | /          | /          | /   | /    | /     | /        | TA-3-1(I5)   | KT820771.1 | China | Pig | 2016 | 96.99 | OQ799819 |
| CHN/Shanxi/XT1/2022   | 2022.5 | Shanxi   | LNCY(G3)     | MF462326.1 | China   | Pig         | 2016 | 92.66 | OQ743907 | SCYA-H2(P13) | MT198757.1 | China      | Pig | 2019 | 96.82 | OQ799704 | VNM14150(I5) | KX363332.1 | UK    | Pig | 2016 | 95.40 | OQ799818 |
| CHN/Shanxi/XT118/2022 | 2022.5 | Shanxi   | NM-9(G9)     | JX498952.1 | China   | Pig         | 2012 | 96.72 | OQ743912 | VP4(P23)     | KC113250.1 | China      | Pig | 2013 | 94.84 | OQ799706 | VNM14150(I5) | KX363332.1 | UK    | Pig | 2016 | 95.48 | OQ799822 |
| CHN/Shanxi/XT3/2022   | 2022.5 | Shanxi   | /            | /          | /       | /           | /    | /     | /        | SCYA-H2(P13) | MT198757.1 | China      | Pig | 2019 | 96.79 | OQ799699 | VNM14150(I5) | KX363332.1 | UK    | Pig | 2016 | 95.56 | OQ799835 |
| CHN/Shanxi/XT5/2022   | 2022.5 | Shanxi   | NM-9(G9)     | JX498952.1 | China   | Pig         | 2012 | 96.74 | OQ743906 | /            | /          | /          | /   | /    | /     | /        | VNM14150(I5) | KX363332.1 | UK    | Pig | 2016 | 95.31 | OQ799817 |
| CHN/Shanxi/XT6/2022   | 2022.5 | Shaanxi  | LNCY(G3)     | MF462326.1 | China   | Pig         | 2016 | 93.08 | OQ743905 | /            | /          | /          | /   | /    | /     | /        | JN-1(I5)     | KT820768.1 | China | Pig | 2016 | 98.16 | OQ799816 |
| CHN/Shanxi/XT7/2022   | 2022.5 | Shanxi   | LNCY(G3)     | MF462326.1 | China   | Pig         | 2016 | 92.86 | OQ743904 | SCYA-H2(P13) | MT198757.1 | China      | Pig | 2019 | 96.82 | OQ799703 | VNM14150(I5) | KX363332.1 | UK    | Pig | 2016 | 95.64 | OQ799815 |
| CHN/Shanxi/XT8/2022   | 2022.5 | Shanxi   | /            | /          | /       | /           | /    | /     | /        | /            | /          | /          | /   | /    | /     | /        | JN-1-1(I5)   | KT820767.1 | China | Pig | 2016 | 95.64 | OQ799809 |
| CHN/JS/XZ6/2022       | 2022.5 | Jiangsu  | HLJsh-1(G9)  | JX498948.1 | China   | Pig         | 2012 | 96.43 | OQ743916 | /            | /          | /          | /   | /    | /     | /        | HN03(I5)     | MH021179.1 | China | Pig | 2018 | 97.77 | OQ799826 |
| CHN/CY/LH8/2022       | 2022.6 | Sichuan  | Segment9(G9) | A7003871.1 | China   | Human       | 2004 | 94.29 | OQ743920 | /            | /          | /          | /   | /    | /     | /        | JN-1(I5)     | KT820768.1 | China | Pig | 2016 | 98.51 | OQ799829 |
| CHN/Shanxi/XT818/2022 | 2022.6 | Shanxi   | CH-1(G1)     | GU188284.1 | China   | Giant panda | 2013 | 94.50 | OQ743913 | GHA-14(P7)   | MN102368.1 | UK         | Pig | 2016 | 93.91 | OQ799707 | VNM14150(I5) | KX363332.1 | UK    | Pig | 2016 | 95.48 | OQ799823 |
| CHN/HuN/CT4/2022      | 2022.6 | Hunan    | VNM(G3)      | KY021150.1 | Vietnam | Pig         | 2017 | 96.70 | OQ743919 | MOZ(P13)     | MT784813.1 | Mozambique | Pig | 2021 | 91.40 | OQ799709 | WF-1-1(I5)   | KT820773.1 | China | Pig | 2016 | 96.93 | OQ799828 |
| CHN/ZJ/CH1/2022       | 2022.6 | Zhejiang | GXqz-2(G9)   | JX498942.1 | China   | Pig         | 2012 | 96.92 | OQ743921 | GHA-14(P7)   | MN102368.1 | UK         | Pig | 2016 | 93.21 | OQ799711 | TA-3-1(I5)   | KT820771.1 | China | Pig | 2016 | 96.68 | OQ799831 |
| CHN/ZJ/CH2/2022       | 2022.6 | Zhejiang | GXqz-2(G9)   | JX498942.1 | China   | Pig         | 2012 | 97.06 | OQ743925 | GHA-14(P7)   | MN102368.1 | UK         | Pig | 2016 | 93.28 | OQ799713 | TA-3-1(I5)   | KT820771.1 | China | Pig | 2016 | 96.90 | OQ799830 |
| CHN/ZJ/CH3/2022       | 2022.6 | Zhejiang | GXqz-2(G9)   | JX498942.1 | China   | Pig         | 2012 | 97.26 | OQ743922 | GHA-14(P7)   | MN102368.1 | UK         | Pig | 2016 | 93.38 | OQ799712 | TA-3-1(I5)   | KT820771.1 | China | Pig | 2016 | 96.90 | OQ799833 |
| CHN/JS/JR/2022        | 2022.6 | Jiangsu  | VP7(G26)     | AB605258.1 | Japan   | pig         | 2011 | 96.53 | OQ743987 | /            | /          | /          | /   | /    | /     | /        | /            | /          | /     | /   | /    | /     | /        |
| CHN/LN/KJW2/2022      | 2022.6 | Liaoning | DZ-2(G5)     | KT820775.1 | China   | Pig         | 2016 | 97.86 | OQ743983 | SCYA-H2(P13) | MT198757.1 | China      | Pig | 2019 | 96.80 | OQ799741 | TA-3-1(I5)   | KT820771.1 | China | Pig | 2016 | 97.09 | OQ799875 |
| CHN/LN/KJW2/96/2022   | 2022.6 | Liaoning | HLJxf(G9)    | JX498950.1 | China   | Pig         | 2012 | 94.22 | OQ743984 | /            | /          | /          | /   | /    | /     | /        | /            | /          | /     | /   | /    | /     | /        |
| CHN/LN/KJW4/11/2022   | 2022.6 | Liaoning | DZ-2(G5)     | KT820775.1 | China   | Pig         | 2016 | 97.97 | OQ743985 | SCYA-H2(P13) | MT198757.1 | China      | Pig | 2019 | 96.81 | OQ799742 | TA-3-1(I5)   | KT820771.1 | China | Pig | 2016 | 97.01 | OQ799876 |
| CHN/HeN/LB106/2022    | 2022.6 | Henan    | NM-9(G9)     | JX498952.1 | China   | Pig         | 2012 | 94.49 | OQ743924 | HLJ1/15(P23) | KU886316.1 | China      | Pig | 2016 | 97.40 | OQ799710 | HN03(I5)     | MH021179.1 | China | Pig | 2018 | 98.24 | OQ799834 |
| CHN/HeN/LB206/2022    | 2022.6 | Henan    | NM-9(G9)     | JX498952.1 | China   | Pig         | 2012 | 94.57 | OQ743923 | /            | /          | /          | /   | /    | /     | /        | HN03(I5)     | MH021179.1 | China | Pig | 2018 | 98.39 | OQ799832 |
| CHN/GS/XC1/2022       | 2022.6 | Gansu    | TM-a-P20(G9) | MH697629.1 | China   | Pig         | 2018 | 97.25 | OQ743962 | /            | /          | /          | /   | /    | /     | /        | /            | /          | /     | /   | /    | /     | /        |
| CHN/GS/XC2/2022       | 2022.6 | Gansu    | TM-a-P20(G9) | MH697629.1 | China   | Pig         | 2018 | 97.15 | OQ743975 | /            | /          | /          | /   | /    | /     | /        | /            | /          | /     | /   | /    | /     | /        |

|                    |        |           |               |            |          |     |      |       |          |              |            |          |     |      |       |          |            |            |       |     |      |       |          |   |
|--------------------|--------|-----------|---------------|------------|----------|-----|------|-------|----------|--------------|------------|----------|-----|------|-------|----------|------------|------------|-------|-----|------|-------|----------|---|
| CHN/GS/XC4/2022    | 2022.6 | Gansu     | TM-a-P20(G9)  | MH697629.1 | China    | Pig | 2018 | 97.55 | OQ743979 | /            | /          | /        | /   | /    | /     | /        | /          | /          | /     | /   | /    | /     | /        | / |
| CHN/ZJ/XH2/2022    | 2022.6 | Zhejiang  | LLP48(G9)     | KJ126835.1 | China    | Pig | 2018 | 95.54 | OQ743986 | /            | /          | /        | /   | /    | /     | /        | /          | /          | /     | /   | /    | /     | /        | / |
| CHN/ZJ/XH3/2022    | 2022.6 | Zhejiang  | LLP48(G9)     | KJ126835.1 | China    | Pig | 2018 | 95.33 | OQ743982 | SCYA-C7(P13) | MT198756.1 | China    | pig | 2019 | 93.97 | OQ799740 | /          | /          | /     | /   | /    | /     | /        | / |
| CHN/JS/XZ/2022     | 2022.6 | Jiangsu   | HLJsh-1(G9)   | JX498948.1 | China    | Pig | 2012 | 96.24 | OQ743940 | CMP178(P13)  | DQ536362.1 | Thailand | Pig | 2008 | 95.97 | OQ799717 | HN03(15)   | MH021179.1 | China | Pig | 2018 | 97.64 | OQ799842 |   |
| CHN/ZJ/ZJ1/2022    | 2022.6 | Zhejiang  | LLP48(G9)     | KJ126835.1 | China    | Pig | 2018 | 95.33 | OQ743947 | SCYA-C7(P13) | MT198756.1 | China    | pig | 2019 | 94.88 | OQ799721 | /          | /          | /     | /   | /    | /     | /        | / |
| CHN/ZJ/ZYF6/2022   | 2022.6 | Zhejiang  | 34461-4(G2)   | AY766085.1 | Italy    | pig | 2005 | 87.74 | OQ743958 | /            | /          | /        | /   | /    | /     | /        | /          | /          | /     | /   | /    | /     | /        | / |
| CHN/GD/DD1/2022    | 2022.7 | Guangdong | DZ-2(G5)      | KT820775.1 | China    | Pig | 2016 | 97.16 | OQ743950 | FX17(P13)    | OM362094.1 | China    | pig | 2022 | 97.79 | OQ799722 | HN03(15)   | MH021179.1 | China | Pig | 2018 | 98.35 | OQ799850 |   |
| CHN/HN/FH2/2022    | 2022.7 | Hainan    | LLP48(G9)     | KJ126835.1 | China    | Pig | 2018 | 97.46 | OQ743932 | /            | /          | /        | /   | /    | /     | /        | TA-3-1(15) | KT820771.1 | China | Pig | 2016 | 96.86 | OQ799836 |   |
| CHN/HN/FH3/2022    | 2022.7 | Hainan    | LLP48(G9)     | KJ126835.1 | China    | Pig | 2018 | 97.46 | OQ743935 | /            | /          | /        | /   | /    | /     | /        | /          | /          | /     | /   | /    | /     | /        | / |
| CHN/SD/LP1/2022    | 2022.7 | Shandong  | LLP48(G9)     | KJ126835.1 | China    | Pig | 2018 | 97.57 | OQ743933 | /            | /          | /        | /   | /    | /     | /        | TA-3-1(15) | KT820771.1 | China | Pig | 2016 | 96.86 | OQ799837 |   |
| CHN/SD/LP3/2022    | 2022.7 | Shandong  | LLP48(G9)     | KJ126835.1 | China    | Pig | 2018 | 97.26 | OQ743936 | FX17(P13)    | OM362094.1 | China    | pig | 2022 | 97.71 | OQ799714 | TA-3-1(15) | KT820771.1 | China | Pig | 2016 | 96.70 | OQ799838 |   |
| CHN/GD/LG2/2022    | 2022.7 | Guangdong | VP7(G26)      | AB605258.1 | Japan    | pig | 2011 | 94.29 | OQ743954 | /            | /          | /        | /   | /    | /     | /        | TA-3-1(15) | KT820771.1 | China | Pig | 2016 | 96.78 | OQ799852 |   |
| CHN/LN/TT1/2022    | 2022.7 | Liaoning  | HLJxf(G9)     | JX498950.1 | China    | Pig | 2012 | 95.03 | OQ743948 | /            | /          | /        | /   | /    | /     | /        | WF-1-1(15) | KT820773.1 | China | Pig | 2016 | 96.47 | OQ799849 |   |
| CHN/LN/TT3/2022    | 2022.7 | Liaoning  | DZ-2(G5)      | KT820775.1 | China    | Pig | 2016 | 98.28 | OQ743945 | HLJ/15(P23)  | KU886316.1 | China    | Pig | 2016 | 94.31 | OQ799719 | WF-1-1(15) | KT820773.1 | China | Pig | 2016 | 96.55 | OQ799847 |   |
| CHN/LN/TT7/2022    | 2022.7 | Liaoning  | HLJxf(G9)     | JX498950.1 | China    | Pig | 2012 | 95.23 | OQ743966 | /            | /          | /        | /   | /    | /     | /        | JN-1(15)   | KT820768.1 | China | Pig | 2016 | 98.42 | OQ799863 |   |
| CHN/LN/TTZD/2022   | 2022.7 | Liaoning  | DZ-2(G5)      | KT820775.1 | China    | Pig | 2016 | 98.27 | OQ743981 | HLJ/15(P23)  | KU886316.1 | China    | Pig | 2016 | 94.14 | OQ799739 | JN-1(15)   | KT820768.1 | China | Pig | 2016 | 97.16 | OQ799874 |   |
| CHN/SD/CL3/2022    | 2022.8 | Shandong  | LLP48(G9)     | KJ126835.1 | China    | Pig | 2018 | 97.57 | OQ743934 | /            | /          | /        | /   | /    | /     | /        | /          | /          | /     | /   | /    | /     | /        | / |
| CHN/GZ/GX3/2022    | 2022.8 | Guizhou   | DZ-2(G5)      | KT820775.1 | China    | Pig | 2016 | 98.17 | OQ743965 | /            | /          | /        | /   | /    | /     | /        | VP6(15)    | KC113249.1 | China | pig | 2013 | 96.64 | OQ799862 |   |
| CHN/TJ/HX5/2022    | 2022.8 | Tianjin   | VP7(G26)      | AB605258.1 | Japan    | pig | 2011 | 96.33 | OQ743972 | SCYA-H2(P13) | MT198757.1 | China    | Pig | 2019 | 97.21 | OQ799735 | HBTS96(15) | OM735819.1 | China | pig | 2021 | 98.49 | OQ799869 |   |
| CHN/HeN/LB1/2022   | 2022.8 | Henan     | VP7(G5)       | DQ515961.1 | Thailand | Pig | 2018 | 92.20 | OQ743974 | CMP178(P13)  | DQ536362.1 | Thailand | Pig | 2008 | 96.24 | OQ799736 | HN03(15)   | MH021179.1 | China | Pig | 2018 | 98.44 | OQ799871 |   |
| CHN/FJ/LH/2022     | 2022.8 | Fujian    | DZ-2(G5)      | KT820775.1 | China    | Pig | 2016 | 97.87 | OQ743961 | /            | /          | /        | /   | /    | /     | /        | TA-3-1(15) | KT820771.1 | China | Pig | 2016 | 97.09 | OQ799858 |   |
| CHN/HeN/TQ2/2022   | 2022.8 | Henan     | SD-1-2021(G9) | ON676185.1 | China    | pig | 2021 | 97.55 | OQ743943 | /            | /          | /        | /   | /    | /     | /        | JN-1(15)   | KT820768.1 | China | Pig | 2016 | 98.58 | OQ799845 |   |
| CHN/SD/LC2/2022    | 2022.9 | Shandong  | SCCD-A(G9)    | MH910068.1 | China    | Dog | 2017 | 97.04 | OQ743951 | /            | /          | /        | /   | /    | /     | /        | /          | /          | /     | /   | /    | /     | /        | / |
| CHN/SD/LCYGZD/2022 | 2022.9 | Shandong  | SCCD-A(G9)    | MH910068.1 | China    | Dog | 2017 | 96.94 | OQ743953 | FX17(P13)    | OM362094.1 | China    | pig | 2022 | 97.79 | OQ799723 | HN03(15)   | MH021179.1 | China | Pig | 2018 | 97.64 | OQ799851 |   |

|                    |        |                |               |            |              |             |      |       |          |               |            |            |     |      |       |          |              |            |       |        |      |       |          |
|--------------------|--------|----------------|---------------|------------|--------------|-------------|------|-------|----------|---------------|------------|------------|-----|------|-------|----------|--------------|------------|-------|--------|------|-------|----------|
| CHN/ZJ/JH/2022     | 2022.9 | Zhejiang       | CH-1(G1)      | GU188284.1 | China        | Giant panda | 2013 | 94.39 | OQ743908 | /             | /          | /          | /   | /    | /     | /        | TA-4-1(15)   | KT820772.1 | China | Pig    | 2016 | 96.49 | OQ799812 |
| CHN/ZJ/ZJ2/2022    | 2022.9 | Zhejiang       | CH-1(G1)      | GU188284.1 | China        | Giant panda | 2013 | 94.12 | OQ743949 | /             | /          | /          | /   | /    | /     | /        | /            | /          | /     | /      | /    | /     | /        |
| CHN/GS/ZC2/2022    | 2022.9 | Gansu          | CH-1(G1)      | GU188284.1 | China        | Giant panda | 2013 | 94.31 | OQ743988 | GHA-14(P7)    | MN102368.1 | UK         | Pig | 2016 | 93.84 | OQ799743 | HN03(15)     | MH021179.1 | China | Pig    | 2018 | 98.35 | OQ799877 |
| CHN/GS/ZC3/2022    | 2022.9 | Gansu          | CH-1(G1)      | GU188284.1 | China        | Giant panda | 2013 | 94.32 | OQ743957 | /             | /          | /          | /   | /    | /     | /        | /            | /          | /     | /      | /    | /     | /        |
| CHN/SD/DE/2022     | 2022.9 | Shandong       | LLP48(G9)     | KJ126835.1 | China        | Pig         | 2018 | 97.36 | OQ743941 | /             | /          | /          | /   | /    | /     | /        | HN03(15)     | MH021179.1 | China | Pig    | 2018 | 98.19 | OQ799843 |
| CHN/LN/GJ3/2022    | 2022.9 | Liaoning       | VNM14250(G4)  | KX363437.1 | UK           | pig         | 2016 | 96.14 | OQ743968 | GUB88(P6)     | AB573872.1 | Japan      | Pig | 2013 | 95.24 | OQ799732 | WF-1-1(15)   | KT820773.1 | China | Pig    | 2016 | 97.49 | OQ799865 |
| CHN/LN/GJZD/2022   | 2022.9 | Liaoning       | DZ-2(G5)      | KT820775.1 | China        | Pig         | 2016 | 98.88 | OQ743970 | VNM14150(P13) | KX363348.1 | Britain    | pig | 2016 | 96.86 | OQ799733 | WF-1-1(15)   | KT820773.1 | China | Pig    | 2016 | 97.49 | OQ799867 |
| CHN/SD/GT1/2022    | 2022.9 | Shandong       | VP7(G5)       | DQ515961.1 | Thailand     | Pig         | 2018 | 92.50 | OQ743963 | SCLS18(P13)   | MT198749.1 | China      | pig | 2019 | 94.72 | OQ799728 | HeNNY-01(15) | MW575221.1 | China | pig    | 2022 | 97.41 | OQ799859 |
| CHN/SD/GT3/2022    | 2022.9 | Shandong       | VP7(G5)       | DQ515961.1 | Thailand     | Pig         | 2018 | 92.40 | OQ743964 | SCLS18(P13)   | MT198749.1 | China      | pig | 2019 | 94.59 | OQ799730 | HN03(15)     | MH021179.1 | China | Pig    | 2018 | 98.19 | OQ799861 |
| CHN/JX/JS1/2022    | 2022.9 | Jiangxi        | VP7(G26)      | AB605258.1 | Japan        | pig         | 2011 | 94.60 | OQ743991 | LCNY(P13)     | MF462324.1 | China      | pig | 2016 | 97.79 | OQ799727 | TA-3-1(15)   | KT820771.1 | China | Pig    | 2016 | 96.54 | OQ799857 |
| CHN/JX/JS2/2022    | 2022.9 | Jiangxi        | /             | /          | /            | /           | /    | /     | /        | MOZ(P13)      | MT784812.1 | Mozambique | Pig | 2021 | 91.82 | OQ799729 | HN03(15)     | MH021179.1 | China | Pig    | 2018 | 97.41 | OQ799860 |
| CHN/CY/SX3/P6/2022 | 2022.9 | Sichuan        | HLJhg7(G11)   | JX498964.1 | China        | Pig         | 2012 | 95.33 | OQ743990 | SCYA-H2(P13)  | MT198757.1 | China      | Pig | 2019 | 97.21 | OQ799745 | /            | /          | /     | /      | /    | /     | /        |
| CHN/SD/LYTGZ3/2022 | 2022.9 | Shandong       | LY-2(G9)      | KT820778.1 | China        | pig         | 2015 | 96.35 | OQ743955 | /             | /          | /          | /   | /    | /     | /        | HN03(15)     | MH021179.1 | China | Pig    | 2018 | 97.56 | OQ799854 |
| CHN/NM/TL12/2022   | 2022.9 | Inner Mongolia | TWN103(G9)    | KU739974.1 | Taiwan-China | pig         | 2017 | 93.42 | OQ743978 | /             | /          | /          | /   | /    | /     | /        | TA-3-1(15)   | KT820771.1 | China | Pig    | 2016 | 97.33 | OQ799873 |
| CHN/LN/YTW1/2022   | 2022.9 | Liaoning       | SD-1-2021(G9) | ON676185.1 | China        | pig         | 2021 | 97.35 | OQ743944 | /             | /          | /          | /   | /    | /     | /        | JN-1(15)     | KT820768.1 | China | Pig    | 2016 | 98.51 | OQ799846 |
| CHN/LN/YTW2/2022   | 2022.9 | Liaoning       | TM-a-P60(G9)  | MH697651.1 | China        | Pig         | 2018 | 97.55 | OQ743946 | HLJ/15(P23)   | KU886316.1 | China      | Pig | 2016 | 94.61 | OQ799720 | JN-1(15)     | KT820768.1 | China | Pig    | 2016 | 98.58 | OQ799848 |
| CHN/SD/DJY6/2022   | 2022.1 | Shandong       | HuBEL2009(G9) | JQ993318.1 | Belgium      | Hu man      | 2012 | 94.62 | OQ743967 | MOZ(P13)      | MT784812.1 | Mozambique | Pig | 2021 | 91.83 | OQ799731 | DZ-1(15)     | KY820766.1 | China | pig    | 2016 | 95.68 | OQ799864 |
| CHN/HuB/GL2/2022   | 2022.1 | Hubei          | /             | /          | /            | /           | /    | /     | /        | NMTL(P23)     | JF781161.1 | China      | Pig | 2008 | 97.44 | OQ799718 | R479(15)     | DQ873675.1 | China | Hu man | 2007 | 96.46 | OQ799844 |
| CHN/GD/WY1/2022    | 2022.1 | Guangdong      | D152(G9)      | KU740013.1 | Taiwan-China | Hu man      | 2015 | 93.94 | OQ743956 | CMP178(P13)   | DQ536362.1 | Thailand   | Pig | 2008 | 96.37 | OQ799725 | HN03(15)     | MH021179.1 | China | Pig    | 2018 | 97.72 | OQ799855 |
| CHN/SD/CY3/2022    | 2022.1 | Shandong       | VP7(G26)      | AB605258.1 | Japan        | pig         | 2011 | 94.80 | OQ743960 | /             | /          | /          | /   | /    | /     | /        | JN-1(15)     | KT820768.1 | China | Pig    | 2016 | 98.19 | OQ799856 |

|                  |        |          |              |            |       |     |      |       |          |              |            |            |     |      |       |          |              |            |       |     |      |       |          |
|------------------|--------|----------|--------------|------------|-------|-----|------|-------|----------|--------------|------------|------------|-----|------|-------|----------|--------------|------------|-------|-----|------|-------|----------|
| CHN/SD/NX2/2022  | 2022.1 | Shandong | TM-a-P60(G9) | MH697651.1 | China | Pig | 2018 | 96.94 | OQ743969 | /            | /          | /          | /   | /    | /     | /        | JN-1(I5)     | KT820768.1 | China | Pig | 2016 | 98.66 | OQ799866 |
| CHN/SD/NX5/2022  | 2022.1 | Shandong | TM-a-P60(G9) | MH697651.1 | China | Pig | 2018 | 96.94 | OQ743971 | CN127(P7)    | ON989016.1 | China      | pig | 2021 | 97.36 | OQ799734 | JN-1(I5)     | KT820768.1 | China | Pig | 2016 | 98.66 | OQ799868 |
| CHN/SD/NX6/2022  | 2022.1 | Shandong | TM-a-P60(G9) | MH697651.1 | China | Pig | 2018 | 96.94 | OQ743973 | CN127(P7)    | ON989016.1 | China      | pig | 2021 | 97.30 | OQ799737 | JN-1(I5)     | KT820768.1 | China | Pig | 2016 | 98.66 | OQ799870 |
| CHN/SD/NX9/2022  | 2022.1 | Shandong | VP7(G26)     | AB605258.1 | Japan | pig | 2011 | 96.33 | OQ743976 | FX17(P13)    | OM362094.1 | China      | pig | 2022 | 97.86 | OQ799738 | HBTS96(I5)   | OM735819.1 | China | pig | 2021 | 98.24 | OQ799872 |
| CHN/SD/TW/2022   | 2022.1 | Shandong | VP7(G26)     | AB605258.1 | Japan | pig | 2011 | 96.21 | OQ743938 | /            | /          | /          | /   | /    | /     | /        | /            | /          | /     | /   | /    | /     | /        |
| CHN/GZ/BJ1/2022  | 2022.1 | Guizhou  | LY-2(G9)     | KT820778.1 | China | pig | 2015 | 95.63 | OQ743937 | MOZ(P13)     | MT784812.1 | Mozambique | Pig | 2021 | 95.92 | OQ799715 | HeNNY-01(I5) | MW575221.1 | China | pig | 2022 | 97.17 | OQ799839 |
| CHN/TJ/HX6/2022  | 2022.1 | Tianjin  | VP7(G26)     | AB605258.1 | Japan | pig | 2011 | 96.13 | OQ743959 | SCYA-H2(P13) | MT198757.1 | China      | Pig | 2019 | 97.07 | OQ799726 | /            | /          | /     | /   | /    | /     | /        |
| CHN/TJ/NHS6/2022 | 2022.1 | Tianjin  | VP7(G26)     | AB605258.1 | Japan | pig | 2011 | 96.23 | OQ743952 | SCYA-H2(P13) | MT198757.1 | China      | Pig | 2019 | 97.10 | OQ799724 | VNM14150(I5) | KX363332.1 | UK    | Pig | 2016 | 96.62 | OQ799853 |
| CHN/SD/SX/2022   | 2022.1 | Shandong | TM-a-P20(G9) | MH697629.1 | China | Pig | 2018 | 97.25 | OQ743942 | /            | /          | /          | /   | /    | /     | /        | HBTS96(I5)   | OM735819.1 | China | pig | 2021 | 98.24 | OQ799840 |
| CHN/CY/XP27/2022 | 2022.1 | Sichuan  | SCJY-11(G9)  | MH910079.1 | China | Pig | 2017 | 98.67 | OQ743939 | NMTL(P23)    | JF781161.1 | China      | Pig | 2008 | 98.59 | OQ799716 | SC11(I5)     | MH624177.1 | China | pig | 2017 | 97.57 | OQ799841 |
