# Supplementary material for: Recent Molecular Characterization of Porcine Rotaviruses Detected in China and Their Phylogenetic Relationships with Human Rotaviruses
Source: MDPI journal article supplement (doi:10.3390/v16030453), 2024-03-14
Supplement: s1 [file s1]

Table S1 Primers used for PoRVA detection and genotyping in this study

| Primer  | Sequence                               | Size (bp) |
|---------|----------------------------------------|-----------|
| qNSP3-F | 5'-ACCATCTACACATGACCCCTCTATGAG-3'      | 83        |
| qNSP3-R | 5'-ACATAACGCCCCCTATAGCCATTTAG-3'       |           |
| qNSP3-P | 5'-FAM-ACAATAGTTAAAAGCTAACACTG-BHQ1-3' |           |
| VP7-F   | 5'-GGCTTTAAAAGAGAGAATTTCC-3'           | 1000      |
| VP7-R   | 5'-GGTCACATCATAACAATTCTAA-3'           |           |
| VP6-F   | 5'-GGCTTTWAAACGAAGTCTTC-3'             |           |
| VP6-R   | 5'-GGTCACATCCTCTCACTA-3'               | 1356      |
| VP4-F   | 5'-GGCTATAAAATGGCTTCGCTCA-3'           |           |
| VP4-R   | 5'-TRCTTAYARTCTACATTGCA-3'             |           |
| VP1-F   | 5'-GGCTATTAAAGCTGTACAATGG-3'           | 3302      |
| VP1-R   | 5'-GGTCACATCTAAGCRCTC-3'               |           |
| VP2-F   | 5'-GGCTATTAAAGGYTCAATGG-3'             |           |
| VP2-R   | 5'-GGTCATATCTCCACAGTGG-3'              | 2717      |
| VP3-F   | 5'-ATGAAAGTATTAGCTTTAAG-3'             |           |
| VP3-R   | 5'-GTGTGTTAAGTTTTTAGCTCAC-3'           |           |
| NSP1-F  | 5'-ATGAAAAGTCTTGTRGAAGCC-3'            | 1500      |
| NSP1-R  | 5'-CCTAGGCGCTACTCTAGTGC-3'             |           |
| NSP2-F  | 5'-GAGCCTTGCGGTGTAGCCATG-3'            |           |
| NSP2-R  | 5'-GGTCACATAAGCGCTTTCT-3'              | 992       |
| NSP3-F  | 5'-GATGGAGTCTACTCAGCAGATGG-3'          |           |
| NSP3-R  | 5'-CTATTGTGCTCATAGAGGGTC-3'            |           |
| NSP4-F  | 5'-AGTTCTGTTCCGAGAGAGCG-3'             | 723       |
| NSP4-R  | 5'-TTCCTTCCATTAACGTCCAAC-3'            |           |
| NSP5-F  | 5'-GGCTTTTAAAGCGCTACAGTG-3'            |           |
| NSP5-R  | 5'-ATCTTCGATCAATTGCATTGC-3'            | 609       |

Note for degenerate bases: W=A or T; R=A or G; Y=C or T.
