# Supplementary material for: Recent Molecular Characterization of Porcine Rotaviruses Detected in China and Their Phylogenetic Relationships with Human Rotaviruses
Source: MDPI journal article supplement (doi:10.3390/v16030453), 2024-03-14
Supplement: s1 [file s1]

**Table S3.** Whole genomic analyses of CHN/SD/LYXH2/2022/G4P6I1 strain detected in diarrheal piglet

| Gene of LYXH2 | Accession NO. of LYXH2 | Closely related strain             | Nucleotide homology (%) | Amino acid homology (%) | Genotype | Accession NO. of reference sequence |
|---------------|------------------------|------------------------------------|-------------------------|-------------------------|----------|-------------------------------------|
| VP1           | OQ799880               | RVA/S79                            | 95.71                   | 96.9                    | R1       | OM201230.1                          |
| VP2           | OQ799881               | RVA/Human/LL3354                   | 95.51                   | 87.8                    | C1       | KC139782.1                          |
| VP3           | OQ799882               | RVA/pig-tc/SCMY/2017/G9P[23]       | 97.49                   | 93.1                    | M1       | MK026437.1                          |
| VP4           | OQ799682               | RVA/Human-wt/R1954/2013/G4P[6]     | 96.67                   | 94.5                    | P6       | KF726067.1                          |
| VP6           | OQ799780               | RVA/Human-wt/R946/2006/G3P[6]      | 96.73                   | 100                     | I1       | KF726057.1                          |
| VP7           | OQ743873               | RVA/Human-wt/SZ18-2049/2018/G4P[6] | 96.73                   | 95                      | G4       | OM920725.1                          |
| NSP1          | OQ799883               | RVA/pig-wt/SCLSHL/2017/G9P[23]     | 95.82                   | 83.9                    | A8       | MH137274.1                          |
| NSP2          | OQ799884               | RVA/Human/LL3354                   | 95.86                   | 93.5                    | N1       | KC139786.1                          |
| NSP3          | OQ799885               | RVA/pig-wt/MRC3878/2008/G5P[X]     | 97.03                   | 90.6                    | T1       | KP753059.1                          |
| NSP4          | OQ799886               | RVA/pig-wt/CN127/2021/G12P[7]      | 98.07                   | 97.3                    | E1       | ON989011.1                          |
| NSP5          | OQ799887               | RVA/Human/LL3354                   | 98.49                   | 99.3                    | H1       | KC139789.1                          |
